# Supplementary material for: Genomic loss of HLA alleles may affect the clinical outcome in low-risk myelodysplastic syndrome patients
Source: PubMed Central journal article supplement (PMC6319343; doi:10.18632/oncotarget.26405), 2018-12-11
Supplement: oncotarget-09-36929-s001.pdf [file oncotarget-09-36929-s001.pdf]

## Genomic loss of HLA alleles may affect the clinical outcome in low-risk myelodysplastic syndrome patients

### SUPPLEMENTARY MATERIALS

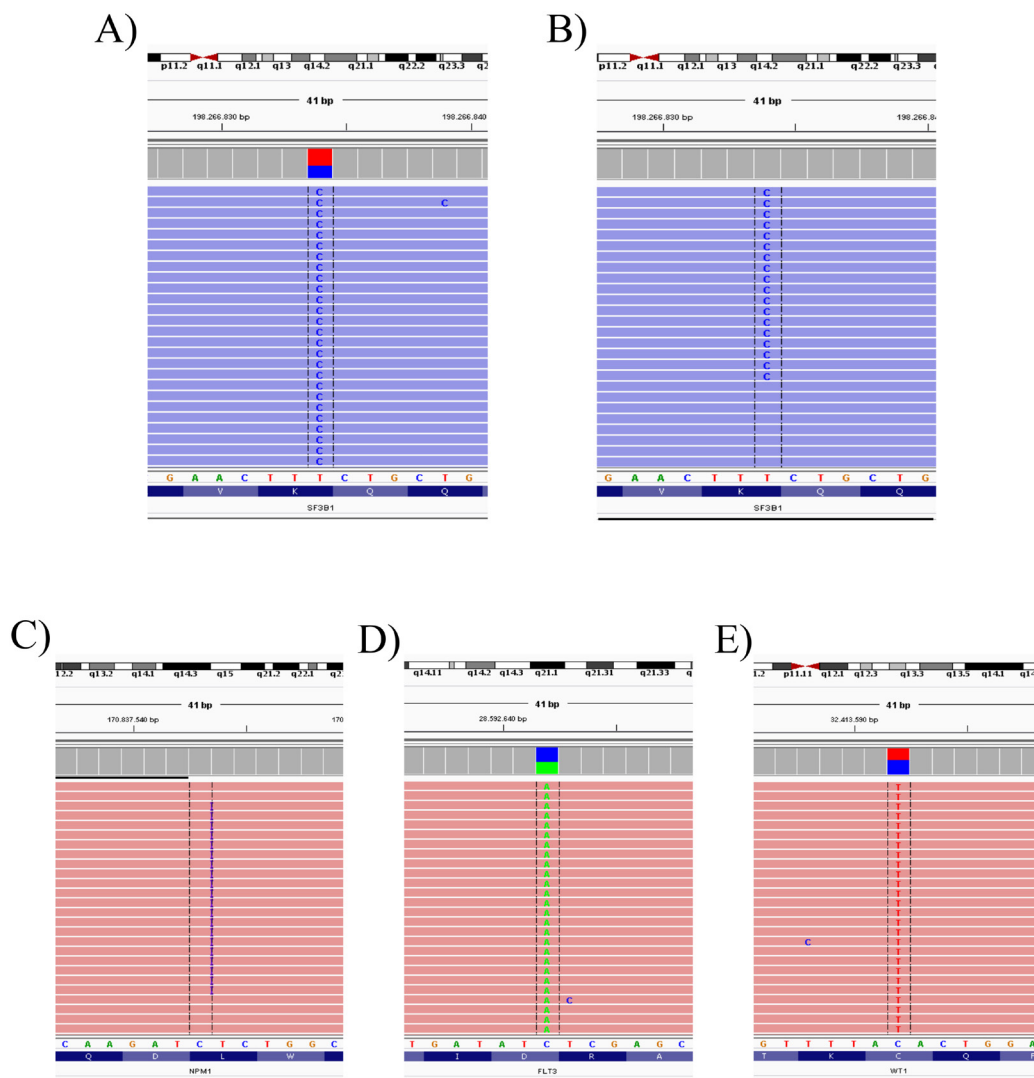

**Supplementary Figure 1:** Integrated Genomic Viewer (IGV) screenshot of the gene variants detected in patients 10 (A and B) and 22 (C, D and E) using NGS techniques. (A) SF3B1 variant found in patient 10 at the time of the second HCT consisted in a recurrent missense mutation (c.2098A>G) in exon 15 which resulted in an amino acid change at position 700 (p.Lys700Glu). The total coverage at the position was 7221 reads, with 40% variant allele frequency (VAF) (2888 reads with SF3B1 mutation variant). (B) At the time of relapse and progression to sAML in patient 10, the same SF3B1 mutation variant (c.2098A>G) was detected. The VAF was 17% with total coverage at the position of 2870 reads (488 reads with SF3B1 mutation variant). No additional mutations were detected at this stage of the patient's disease. In patient 22, NPM1 (C), FLT3 (D) and WT1 (E) mutations were detected at the time of the relapse. (C) NPM1 variant was a recurrent mutation type A that consisted in a 4 bp insertion (c.860\_863dupTCTG) resulting in a frameshift alteration (p.Trp288Cysfs\*). The mean coverage of sequence was 5400 reads, with 34% VAF (1836 altered reads). (D) FLT3 variant was the missense mutation in exon 20, which resulted in an amino acid change at position 835 (p.Asp835Tyr) (FLT3-TKD mutation). The total coverage at the position was 15300 reads, with 43% VAF (6579 reads with FLT3-TKD mutation). (E) WT1 variant consisted in a missense mutation (c.1307G>A) resulting in an amino acid change at position 436 (p.Cys436Tyr). The VAF was 47% with total coverage at the position of 8960 reads (4211 reads with WT1 mutation variant).

**Supplementary Table 1: Description of karyotypes and mutational profiles for 27 patients in the study.**

| PATIENTS | WHO-2016        | KARYOTYPE DESCRIPTION                                                                           | MUTATIONAL PROFILE |                         |         |                         |
|----------|-----------------|-------------------------------------------------------------------------------------------------|--------------------|-------------------------|---------|-------------------------|
|          |                 |                                                                                                 | Gen                | Nucleotide              | VAF (%) | Protein                 |
| 1        | <i>MDS EB-1</i> |                                                                                                 | <i>TP53</i>        | <i>c. 659A&gt;G</i>     | 84      | <i>p.Tyr220Cys</i>      |
|          |                 |                                                                                                 | <i>TET2</i>        | <i>c.3635T&gt;A</i>     | 84      | <i>p.Leu1212*</i>       |
|          |                 |                                                                                                 | <i>U2AF1</i>       | <i>c.470A&gt;G</i>      | 3       | <i>p.Gln157Arg</i>      |
| 2        | MDS EB-1        | 44,XY, -5, -7                                                                                   | <i>TP53</i>        | <i>c. 455C&gt;T</i>     | 47      | <i>p.Pro152Leu</i>      |
| 3        | MDS EB-2        | 45,XY, -7(4)/46,XY(16)                                                                          | ND                 | ND                      | ND      | ND                      |
| 4        | MSD EB-2        | 45,X, del(11)(q21;q23)                                                                          | <i>RUNX1</i>       | <i>c.86T&gt;C</i>       | 50      | <i>p.Leu29Set</i>       |
| 5        | MSD EB-2        | 46,XX, add(6), add(10), del(11), add(14), -15, -19, +1mar, +2mar                                | Not detected       |                         |         |                         |
| 6        | MDS EB-2        | ND                                                                                              | <i>ASXL1</i>       | <i>c.1934dupG</i>       | 42      | <i>p.Gly646Trpfs*12</i> |
|          |                 |                                                                                                 | <i>RUNX1</i>       | <i>c.519C&gt;T</i>      | 41      | <i>p.Arg177*</i>        |
|          |                 |                                                                                                 | <i>SRSF2</i>       | <i>c.284C&gt;T</i>      | 49      | <i>p.Pro95Leu</i>       |
|          |                 |                                                                                                 | <i>IDH1</i>        | <i>c.395G&gt;A</i>      | 36      | <i>p.Arg132His</i>      |
|          |                 |                                                                                                 | <i>TET2</i>        | <i>c.1648C&gt;T</i>     | 2       | <i>p.Arg550*</i>        |
| 7        | MSD EB-2        | 46,XY, del(5)(q13;q33) (8)/45,XY, -1, del(5), add(10)(q26) (23)/49,XY, +1, del(5), +11, +14 (8) | <i>TP53</i>        | <i>c.742C&gt;T</i>      | 89      | <i>p.Arg248Trp</i>      |
| 8        | MSD-EB-2        | 46,XX, del(5q)(q15;q33)                                                                         | <i>SF3B1</i>       | <i>c.2098A&gt;G</i>     | 33      | <i>p.Lys700Glu</i>      |
|          |                 |                                                                                                 | <i>NPM1</i>        | <i>c.860_863dupTCTG</i> | 26      | <i>p.Trp288Cysfs*</i>   |
| 9        | sAML            | 46,XX, del(5q)                                                                                  | Not detected       |                         |         |                         |
| 10       | sAML            | 46,XX, del(5q)                                                                                  | <i>SF3B1</i>       | <i>c.2098A&gt;G</i>     | 17      | <i>p.Lys700Glu</i>      |
| 11       | sAML            | 45,XY, -3, del(5)(q13;q33), add(6)(p25), +8, add(17)(p13), del(20)(q11.2), -22                  | <i>TP53</i>        | <i>c.844C&gt;T</i>      | 59      | <i>p.Arg282Trp</i>      |
| 12       | sAML            | 46,XX                                                                                           | <i>SF3B1</i>       | <i>c.2098 A&gt;G</i>    | 49      | <i>p.Lys700Glu</i>      |
|          |                 |                                                                                                 | <i>DNMT3A</i>      | <i>c.2612C&gt;T</i>     | 45      | <i>p.Pro871Leu</i>      |
|          |                 |                                                                                                 | <i>TET2</i>        | <i>c.4570C&gt;T</i>     | 51      | <i>p.Gln1524*</i>       |
| 13       | sAML            | 47,XY, +8                                                                                       | <i>ASXL1</i>       | <i>c.1934dupG</i>       | 42      | <i>p.Gly646Trpfs*12</i> |
|          |                 |                                                                                                 | <i>EZH2</i>        | <i>2003A&gt;G</i>       | 50      | <i>p.Asn668Ser</i>      |
|          |                 |                                                                                                 | <i>ETV6</i>        | <i>c.1079G&gt;C</i>     | 13      | <i>p.Trp360Ser</i>      |
|          |                 |                                                                                                 | <i>KRAS</i>        | <i>c.35G&gt;T</i>       | 29      | <i>p.Gly12Val</i>       |
|          |                 |                                                                                                 | <i>PTPN11</i>      | <i>c.1508G&gt;A</i>     | 7       | <i>p.Gly503Glu</i>      |
|          |                 |                                                                                                 | <i>ABL1</i>        | <i>c.820G&gt;A</i>      | 10      | <i>p.Glu274Lys</i>      |
| 14       | sAML            | ND                                                                                              | <i>TP53</i>        | <i>c.638G&gt;T</i>      | 67      | <i>p.Arg213Leu</i>      |
|          |                 |                                                                                                 | <i>U2AF1</i>       | <i>c.467G&gt;A</i>      | 40      | <i>p.Arg156His</i>      |
|          |                 |                                                                                                 | <i>NRAS</i>        | <i>c.35G&gt;C</i>       | 11      | <i>p.Gly12Ala</i>       |
| 15       | sAML            | ND                                                                                              | <i>RUNX1</i>       | <i>c.1016_1017insGT</i> | 60      | <i>p.Ile339Metfs*</i>   |
|          |                 |                                                                                                 | <i>U2AF1</i>       | <i>c.101C&gt;T</i>      | 42      | <i>p.Ser34Phe</i>       |
|          |                 |                                                                                                 | <i>BCOR</i>        | <i>c.4871_4872delAG</i> | 43      | <i>p.Gln162Argfs*13</i> |
|          |                 |                                                                                                 | <i>NRAS</i>        | <i>c.356G&gt;A</i>      | 22      | <i>p.Gly12Asp</i>       |
|          |                 |                                                                                                 | <i>FLT3-TKD</i>    | <i>c.2503G&gt;A</i>     | 13      | <i>p.Asp835Asn</i>      |

| PATIENTS | WHO-2016    | KARYOTYPE DESCRIPTION   | MUTATIONAL PROFILE |                     |         |                   |
|----------|-------------|-------------------------|--------------------|---------------------|---------|-------------------|
|          |             |                         | Gen                | Nucleotide          | VAF (%) | Protein           |
| 16       | sAML        | ND                      | <b>RUNX1</b>       | c.404G>A            | 9       | p. Lys580Glu      |
|          |             |                         | <b>EZH2</b>        | c.1975G>A           | 41      | p.Asp659Asn       |
|          |             |                         | <b>ASXL1</b>       | c.2122C>T           | 44      | p. Gln708*        |
|          |             |                         | <b>SF3B1</b>       | c.2342A>G           | 44      | p.Asp781Gly       |
|          |             |                         | <b>SETBP1</b>      | c.2608G>A           | 9       | p. Gly870Ser      |
| 17       | sAML        | ND                      | RUNX1              | c.416G>A            | 44      | p.Arg139Gln       |
|          |             |                         | <b>SF3B1</b>       | c.2098A>G           | 46      | p.Lys700Glu       |
|          |             |                         | <b>IDH2</b>        | c.419G>A            | 46      | p.Arg140Gln       |
|          |             |                         | <b>DNMT3A</b>      | c.2645G>A           | 46      | p.Arg882His       |
| 18       | sAML        | ND                      | <b>TP53</b>        | c.1043delT          | 57      | p.Leu348Trpfs*22  |
| 19       | sAML        | ND                      | <b>RUNX1</b>       | c.792_803del10ins2  | 48      | p.Ile264Metfs*17  |
|          |             |                         | <b>EZH2</b>        | c.857G>A            | 47      | p.Cys286Tyr       |
|          |             |                         | <b>EZH2</b>        | c.619C>T            | 48      | p.Arg207*         |
|          |             |                         | <b>IDH2</b>        | c.419G.>A           | 48      | p.Arg140Gln       |
|          |             |                         | <b>CUX1</b>        | c.764A>T            | 47      | p.Glu255Val       |
| 20       | CMML-0      | 46, XY                  | STAG2              | c.226C>T            | 90      | p.Gln76*          |
|          |             |                         | <b>ASXL1</b>       | c.1773C>A           | 51      | p.Tyr591*         |
|          |             |                         | <b>SRSF2</b>       | c.284C>A            | 51      | p.Pro95His        |
|          |             |                         | <b>TET2</b>        | c.3732_3733del CT   | 50      | p.Tyr1245Glyfs*22 |
|          |             |                         | <b>TET2</b>        | c.3733_3737delTACTC | 43      | p.Tyr1245Glyfs*21 |
| 21       | CMML-1      | 46,XX, del(5q)          | <b>TP53</b>        | c.393_395delCAA     | 97      | p.Asn131del       |
|          |             |                         | KRAS               | c.35G>T             | 16      | p.Gly12Val        |
| 22       | De novo AML | 45, X (5) / 46, XY (15) | NPM1               | c.860_863dupTCTG    | 34      | p.Trp288Cysfs*    |
|          |             |                         | <b>FLT3</b>        | c.2503G>T           | 43      | p.Asp835Tyr       |
|          |             |                         | <b>WT1</b>         | c.1307G>A           | 47      | p.Cys436Tyr       |
| 23       | De novo AML | 46, XY                  | Not detected       |                     |         |                   |
| 24       | De novo AML | 47, XY, +8              | NPM1               | c.860_863dupTCTG    | 29      | p.Trp288Cysfs*    |
|          |             |                         | <b>PTPN11</b>      | c.205G>A            | 10.4    | p.Glu69Lys        |
| 25       | De novo AML | ND                      | ZRSR2              | c.1354C>T           | 51      | p.Arg452Cys       |
| 26       | De novo AML | 46, XX, del(5)(q13;q33) | <b>DNMT3A</b>      | c.2711C>T           | 50      | p.Pro904Leu       |
| 27       | De novo AML | ND                      | <b>TP53</b>        | c.488A>G            | 46      | p.Tyr163Cys       |
|          |             |                         | <b>TP53</b>        | c.919+1G>A          | 42      |                   |

VAF: Variant Allele Frequency; ND: No Data.

Genes in bold are High Molecular Risk (HMR) genes [1].

## REFERENCES

1. Bejar R, Steensma DP. Recent developments in myelodysplastic syndromes. Blood. 2014; 124:2793-803. <https://doi.org/10.1182/blood-2014-04-522136>.
